# Supplementary material for: Modulation of partition and localization of perfume molecules in sodium dodecyl sulfate micelles
Source: Royal Society of Chemistry journal article supplement (doi:10.1039/c5sm02145f), 2015-10-06
Supplement: c5sm02145f1.pdf [file c5sm02145f1.pdf]

Electronic Supplementary Material (ESI) for Soft Matter.

This journal is © The Royal Society of Chemistry 2015

**Supporting Information for Manuscript Entitled**  
**Modulation of Partition and Localization of Perfume Molecules in Sodium**  
**Dodecyl Sulfate Micelles**

Yaxun Fan,<sup>a</sup> Haiqiu Tang,<sup>\*b</sup> Ross Strand,<sup>b</sup> and Yilin Wang<sup>\*a</sup>

<sup>a</sup>*Key Laboratory of Colloid and Interface Science, Beijing National Laboratory for Molecular Sciences (BNLMS), Institute of Chemistry, Chinese Academy of Sciences, Beijing 100190, P. R. China.*

<sup>b</sup>*Procter & Gamble Technology (Beijing) Co. Ltd, Beijing 101312, P. R. China.*

**Calculation of the fraction of perfume molecules incorporated into micelles**

Assuming two sites of perfume molecule localization in the sample: Free molecules diffusing with  $D_f$ , the diffusion coefficient of the perfume molecules in  $D_2O$ , and molecules incorporated into the micelle, diffusing with  $D_M$ , the diffusion coefficient of the micelle in the mixture. However, the diffusion coefficient of surfactant alone  $D_s$  can be obtained from the diffusion results. Therefore, it is essential to note that surfactant diffusion coefficients  $D_s$  in micellar solutions are weighted averages of the monomer diffusion coefficient  $D_1$  and the micellar diffusion coefficient  $D_M$  according to:

$$D_s = f_M D_M + f_1 D_1, \quad [1]$$

where  $f_M$  and  $f_1$  are the fractions of surfactant present in micelles and as monomer in the aqueous phase, respectively. This equation holds for fast exchange between monomeric and micellar surfactant, which is typically the case in micellar solution. In this present study, the concentration of SDS (97.5 mM) was much larger than the critical micelle concentration. Thus compared to  $f_M$ , the monomer fraction  $f_1$  can be neglected and  $D_s$  is equal to  $D_M$ .

The observed diffusion coefficient  $D$  of the perfume molecule then is a fast exchange average over these two sites, which is weighted by the fraction of molecules in either site. With  $f_p$  as the fraction of perfume molecules incorporated into the micelle, it is:

$$D = f_p D_M + (1 - f_p) D_f = D_f + f_p (D_M - D_f). \quad [2]$$

Thus,

$$f_p = \frac{D_f - D}{D_f - D_M}. \quad [3]$$



**Table S1.** The structural parameters of the SDS and SDS/perfume micelles from the SAXS data fitted with the ellipsoid model.

| <b>Systems</b>        | <b><math>R_a</math> (Å)</b> | <b><math>R_b</math> (Å)</b> | <b><math>V_{\text{ellipsoid}}</math> (Å<sup>3</sup>)</b> | <b><math>R_b/R_a</math></b> | <b><math>R_g</math> (Å)</b> | <b><math>N_{\text{agg}}</math></b> |
|-----------------------|-----------------------------|-----------------------------|----------------------------------------------------------|-----------------------------|-----------------------------|------------------------------------|
| SDS                   | 15.0                        | 21.0                        | $2.8 \times 10^4$                                        | 1.40                        | 12.9                        | 58                                 |
| SDS/Ethyl Butyrate    | 15.2                        | 21.3                        | $2.9 \times 10^4$                                        | 1.40                        | 13.1                        | 60                                 |
| SDS/Methyl Paraben    | 15.6                        | 21.7                        | $3.1 \times 10^4$                                        | 1.39                        | 13.4                        | 64                                 |
| SDS/Methyl Salicylate | 16.2                        | 22.5                        | $3.4 \times 10^4$                                        | 1.39                        | 13.9                        | 72                                 |
| SDS/Anethole          | 16.5                        | 23.0                        | $3.7 \times 10^4$                                        | 1.39                        | 14.2                        | 76                                 |
| SDS/Linalool          | 16.1                        | 23.2                        | $3.6 \times 10^4$                                        | 1.44                        | 14.1                        | 76                                 |
| SDS/Piperitone        | 16.1                        | 22.5                        | $3.4 \times 10^4$                                        | 1.40                        | 13.8                        | 71                                 |
| SDS/Carvone           | 16.4                        | 22.7                        | $3.5 \times 10^4$                                        | 1.38                        | 14.0                        | 74                                 |
| SDS/Menthone          | 16.2                        | 22.1                        | $3.3 \times 10^4$                                        | 1.36                        | 13.7                        | 69                                 |
| SDS/Menthol           | 16.4                        | 23.0                        | $3.6 \times 10^4$                                        | 1.40                        | 14.1                        | 76                                 |
| SDS/Eucalyptol        | 16.5                        | 22.3                        | $3.4 \times 10^4$                                        | 1.35                        | 13.9                        | 72                                 |
| SDS/Menthyl Acetate   | 16.4                        | 23.8                        | $3.9 \times 10^4$                                        | 1.45                        | 14.5                        | 81                                 |
| SDS/Limonene          | 16.2                        | 23.3                        | $3.7 \times 10^4$                                        | 1.44                        | 14.2                        | 77                                 |
| SDS/Pinene            | 16.4                        | 24.0                        | $4.0 \times 10^4$                                        | 1.46                        | 14.5                        | 82                                 |
